# Supplementary material for: Promoted photocarrier separation by dipole engineering in two-dimensional perovskite/C2N van der Waals heterostructures
Source: Royal Society of Chemistry journal article supplement (doi:10.1039/d2cp01555b), 2022-01-01
Supplement: d2cp01555b1.pdf [file d2cp01555b1.pdf]

## Supplementary Information

### Promoted photocarriers separation by dipole engineering in two-dimensional perovskite/C<sub>2</sub>N van der Waals heterostructures

Hui Wang,<sup>a</sup> Jun Ma,<sup>b</sup> Zheng Chen,<sup>c</sup> Yujie Yuan,<sup>a</sup> Baozeng Zhou,<sup>\*a</sup> Wei Li<sup>\*a</sup>

<sup>a</sup> *Tianjin Key Laboratory of Film Electronic & Communicate Devices, School of Integrated Circuit Science and Engineering, Tianjin University of Technology, Tianjin 300384, China*

<sup>b</sup> *International School for Optoelectronic Engineering, Qilu University of Technology (Shandong Academy of Sciences), Jinan, 250353, China*

<sup>c</sup> *School of Chemistry and Chemical Engineering, Tianjin University of Technology, Tianjin, 300384, PR China*

\*Corresponding Authors

[baozeng@tju.edu.cn](mailto:baozeng@tju.edu.cn) (B. Zhou)

[cliwei618@126.com](mailto:cliwei618@126.com) (W, Li)

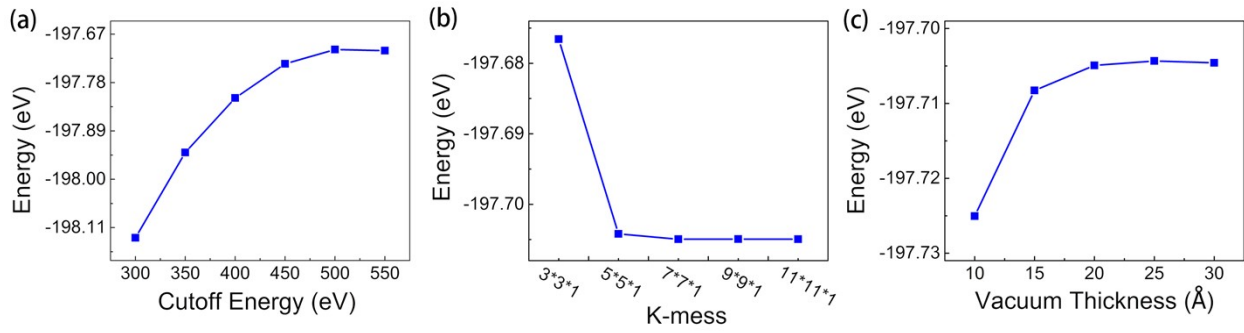

**Fig. S1.** The convergence tests on the (a) cutoff energy, (b)  $k$ -points, and (c) thickness of vacuum layer.

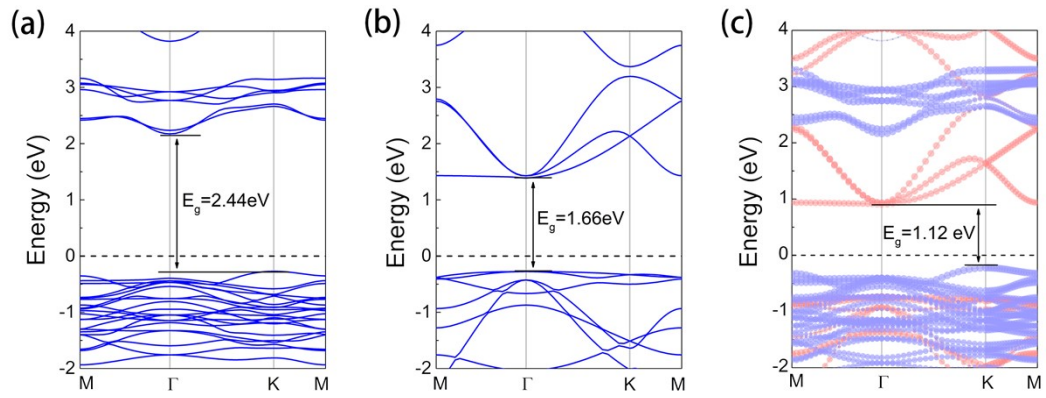

**Fig. S2.** Calculated band structures of (a)  $\text{Cs}_3\text{Bi}_2\text{I}_9$  monolayer, (b)  $\text{C}_2\text{N}$  monolayer, and (c)  $\text{Cs}_3\text{Bi}_2\text{I}_9/\text{C}_2\text{N}$  heterostructure calculated by PBE functional. The Fermi level is set to zero.

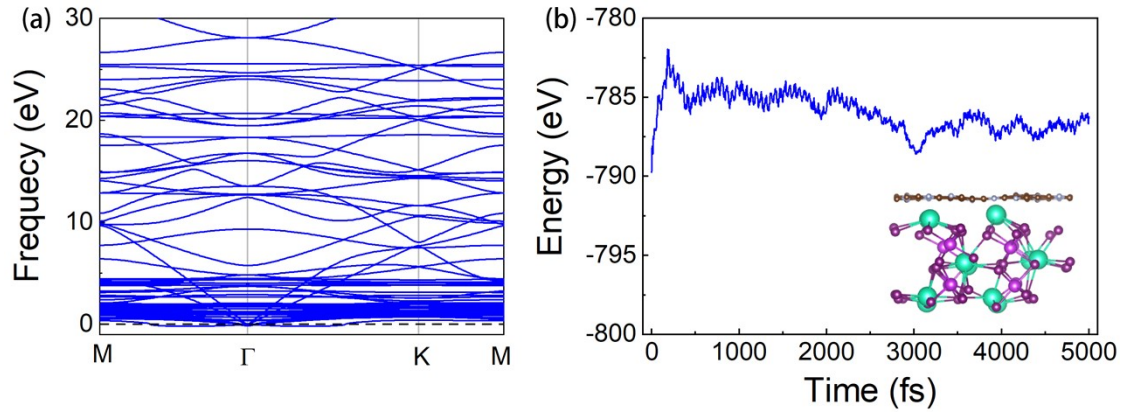

**Fig. S3.** (a) The phonon band dispersions and (b) potential energy fluctuations of Cs<sub>3</sub>Bi<sub>2</sub>I<sub>9</sub>/C<sub>2</sub>N heterostructure. The inset shows the corresponding structure at 300 K after the simulation for 5 ps.

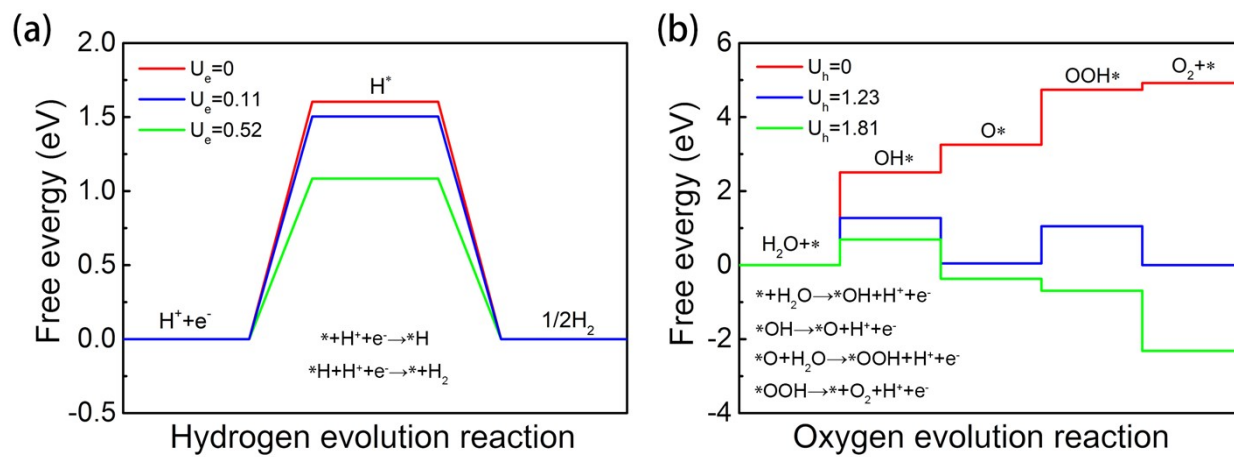

**Fig. S4.**  $\Delta G$  of the (a) HER and (b) OER pathway. The insets show the reaction steps.

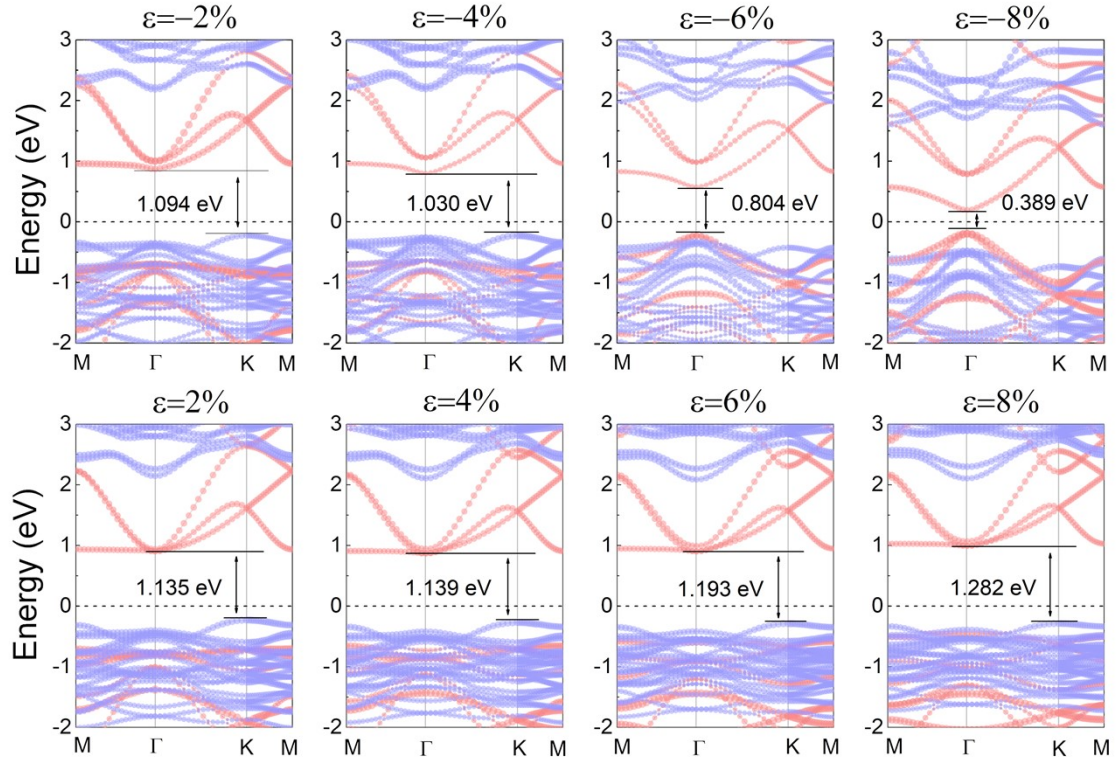

**Fig. S5.** The band structures of the  $\text{Cs}_3\text{Bi}_2\text{I}_9/\text{C}_2\text{N}$  heterostructure under different in-plane biaxial strains based on PBE method. The Fermi level is set to zero.

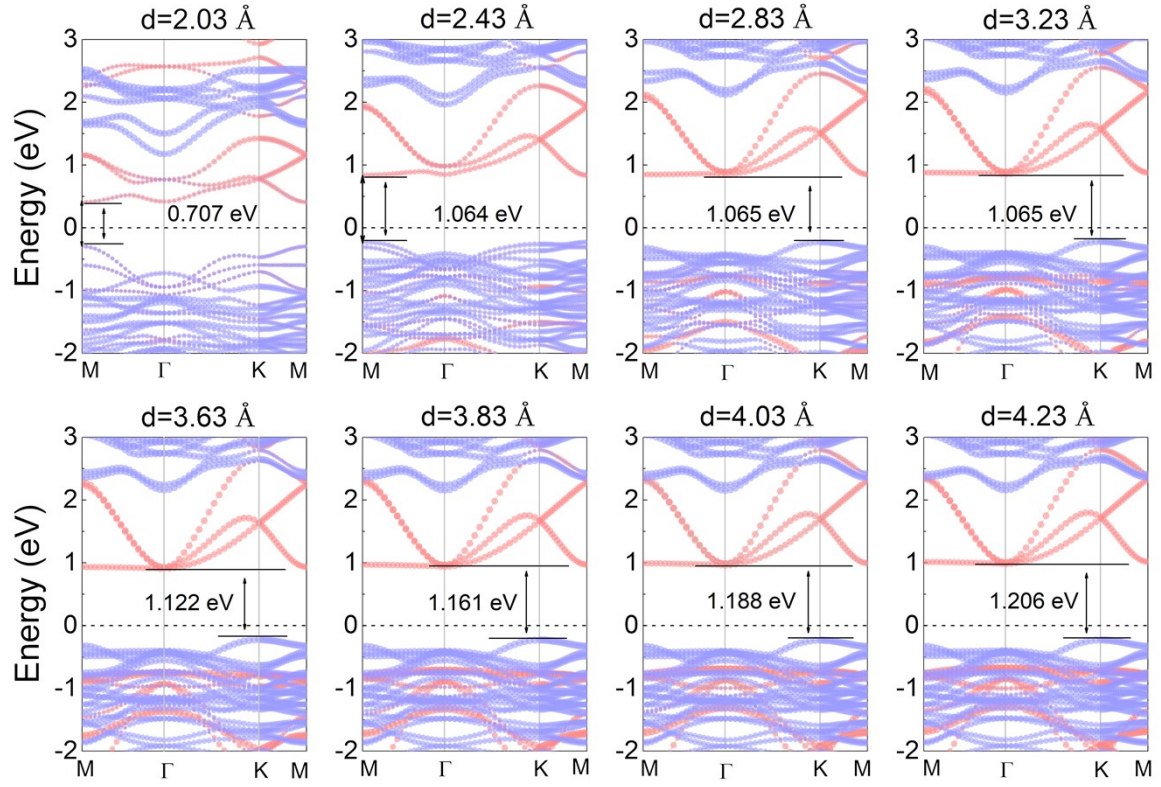

**Fig. S6.** The band structures of the  $\text{Cs}_3\text{Bi}_2\text{I}_9/\text{C}_2\text{N}$  heterostructure with different interlayer distances based on PBE method. The Fermi level is set to zero.

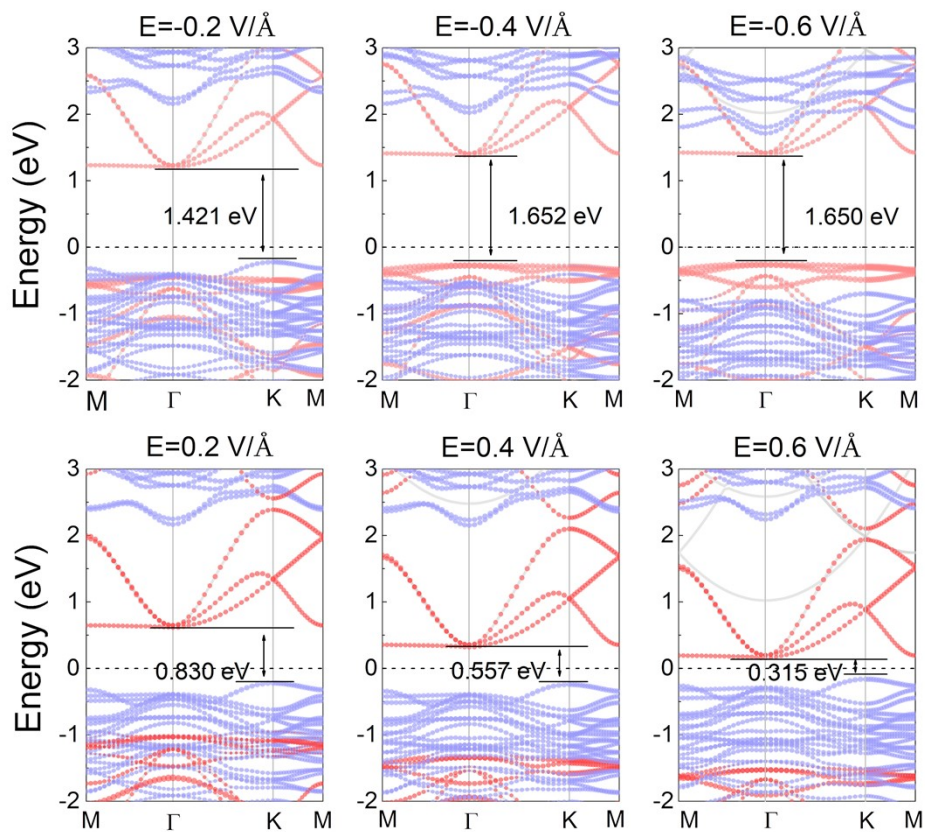

**Fig. S7.** The band structures of the  $\text{Cs}_3\text{Bi}_2\text{I}_9/\text{C}_2\text{N}$  heterostructure with different electric fields based on PBE method. The Fermi level is set to zero.



**Table S1.** The lattice vectors and fractional coordinates of each atom in Cs<sub>3</sub>Bi<sub>2</sub>I<sub>9</sub> monolayer.

|             |                     |                    |                     |
|-------------|---------------------|--------------------|---------------------|
| <b>a[Å]</b> | 8.5967998505000001  | 0.0000000000000000 | 0.0000000000000000  |
| <b>b[Å]</b> | -4.2983999252000000 | 7.4450470618000004 | 0.0000000000000000  |
| <b>c[Å]</b> | 0.0000000000000000  | 0.0000000000000000 | 32.4808006287000026 |
| <b>Cs</b>   | 0.6666666630000009  | 0.3333333260000018 | 0.6014199999999974  |
| <b>Cs</b>   | 0.6666666630000009  | 0.3333333260000018 | 0.3985800290000014  |
| <b>Cs</b>   | 0.0000000000000000  | 0.0000000000000000 | 0.5000000000000000  |
| <b>Bi</b>   | 0.3333333260000018  | 0.6666666520000035 | 0.4337500130000009  |
| <b>Bi</b>   | 0.3333333260000018  | 0.6666666520000035 | 0.5662499569999966  |
| <b>I</b>    | 0.6748099949999968  | 0.8373999840000010 | 0.3864999919999974  |
| <b>I</b>    | 0.1625999760000028  | 0.8374099749999999 | 0.3864999919999974  |
| <b>I</b>    | 0.1625900209999998  | 0.3251899979999990 | 0.3864999919999974  |
| <b>I</b>    | 0.6748099949999968  | 0.8373999840000010 | 0.6135000080000026  |
| <b>I</b>    | 0.1625999760000028  | 0.8374099749999999 | 0.6135000080000026  |
| <b>I</b>    | 0.1625900209999998  | 0.3251899979999990 | 0.6135000080000026  |
| <b>I</b>    | 0.9976900449999988  | 0.4988499829999995 | 0.5000000000000000  |
| <b>I</b>    | 0.5011499940000022  | 0.4988400240000033 | 0.5000000000000000  |
| <b>I</b>    | 0.5011599810000007  | 0.0023099779999995 | 0.5000000000000000  |

**Table S2.** The lattice vectors and fractional coordinates of each atom in C<sub>2</sub>N monolayer.

|             |                     |                     |                     |
|-------------|---------------------|---------------------|---------------------|
| <b>a[Å]</b> | 8.3287319581807910  | -0.0000086375643439 | 0.0000000000000000  |
| <b>b[Å]</b> | -4.1643734594268507 | 7.2128776652686950  | 0.0000000000000000  |
| <b>c[Å]</b> | 0.0000000000000000  | 0.0000000000000000  | 28.6035003661999987 |
| <b>C</b>    | 0.6649572866375831  | 0.1584761652715319  | 0.5955600433095020  |
| <b>C</b>    | 0.3349885443879356  | 0.8415201333268880  | 0.5956595566038005  |
| <b>C</b>    | 0.8414926157747485  | 0.5064955199102057  | 0.5955571754278379  |
| <b>C</b>    | 0.1584452948996779  | 0.4934817062717273  | 0.5956610035639622  |
| <b>C</b>    | 0.4934733252926527  | 0.3350109869042917  | 0.5955641888062967  |
| <b>C</b>    | 0.5064836582225742  | 0.6649773415631767  | 0.5956531663188126  |
| <b>C</b>    | 0.1584470410483025  | 0.6649779869047788  | 0.5956589147980300  |
| <b>C</b>    | 0.8414891099342869  | 0.3350094274929322  | 0.5955609477713283  |
| <b>C</b>    | 0.5064848012035074  | 0.8415210432113602  | 0.5956545249771583  |
| <b>C</b>    | 0.4934729002164080  | 0.1584767113576188  | 0.5955655530966505  |
| <b>C</b>    | 0.3349890260971121  | 0.4934829240720786  | 0.5956606190163212  |
| <b>C</b>    | 0.6649577975526456  | 0.5064937770785224  | 0.5955574130945321  |
| <b>N</b>    | 0.0000345343050144  | 0.6688782423430601  | 0.5955862260575377  |
| <b>N</b>    | 0.0000303720937557  | 0.3311047793888947  | 0.5955904449498829  |
| <b>N</b>    | 0.3310876579249200  | 0.3311005900158068  | 0.5955960398514453  |
| <b>N</b>    | 0.6688635075330792  | 0.6688793235882384  | 0.5955784847071436  |
| <b>N</b>    | 0.6688656689146286  | 0.0000004111987619  | 0.5955828544814462  |
| <b>N</b>    | 0.3310887337587158  | -0.0000013558998655 | 0.5955944541683168  |

**Table S3.** The lattice vectors and fractional coordinates of each atom in Cs<sub>3</sub>Bi<sub>2</sub>I<sub>9</sub>/C<sub>2</sub>N heterostructure.

|             |                     |                    |                     |
|-------------|---------------------|--------------------|---------------------|
| <b>a[Å]</b> | 8.3502998351999995  | 0.0000000084114841 | 0.0000000000000000  |
| <b>b[Å]</b> | -4.1751499175999998 | 7.2315717865000000 | 0.0000000000000000  |
| <b>c[Å]</b> | 0.0000000000000000  | 0.0000000000000000 | 36.4038009643999985 |
| <b>C</b>    | 0.6649399969999976  | 0.1584500000000020 | 0.6159800470000008  |
| <b>C</b>    | 0.8415500139999992  | 0.5064899970000027 | 0.6159800470000008  |
| <b>C</b>    | 0.4935099810000025  | 0.3350599870000011 | 0.6159800470000008  |
| <b>C</b>    | 0.8415500059999985  | 0.3350599870000011 | 0.6159800470000008  |
| <b>C</b>    | 0.4935100029999973  | 0.1584500000000020 | 0.6159800470000008  |
| <b>C</b>    | 0.6649399840000001  | 0.5064899970000027 | 0.6159800470000008  |
| <b>C</b>    | 0.3350599930000016  | 0.8414199540000027 | 0.6159700400000006  |
| <b>C</b>    | 0.1585799899999998  | 0.4936399850000015 | 0.6159700400000006  |
| <b>C</b>    | 0.5063599850000031  | 0.6649399969999976 | 0.6159700400000006  |
| <b>C</b>    | 0.1585800129999981  | 0.6649399969999976 | 0.6159700400000006  |
| <b>C</b>    | 0.5063599610000011  | 0.8414199540000027 | 0.6159700400000006  |
| <b>C</b>    | 0.3350599939999981  | 0.4936399850000015 | 0.6159700400000006  |
| <b>N</b>    | 0.0001900079999970  | 0.6684200199999992 | 0.6159800470000008  |
| <b>N</b>    | 0.3315799900000016  | 0.3317699979999986 | 0.6159800470000008  |
| <b>N</b>    | 0.6682299860000001  | 0.9998099499999995 | 0.6159800470000008  |
| <b>N</b>    | 0.3315799929999983  | 0.9998099499999995 | 0.6159800470000008  |
| <b>N</b>    | 0.6682299830000034  | 0.6684200199999992 | 0.6159800470000008  |
| <b>N</b>    | 0.0001899940000030  | 0.3317699979999986 | 0.6159800470000008  |
| <b>Cs</b>   | 0.6666666639999974  | 0.3333333280000019 | 0.5070600159999969  |
| <b>Cs</b>   | 0.6666666639999974  | 0.3333333280000019 | 0.3198899819999994  |
| <b>Cs</b>   | 0.0000000000000000  | 0.0000000000000000 | 0.4147700130000018  |
| <b>Bi</b>   | 0.3333333280000019  | 0.6666666559999967 | 0.3559800089999996  |
| <b>Bi</b>   | 0.3333333280000019  | 0.6666666559999967 | 0.4727999620000034  |
| <b>I</b>    | 0.6796399699999967  | 0.8398200279999983 | 0.3128400249999999  |
| <b>I</b>    | 0.1601799399999990  | 0.8398199620000000 | 0.3128400249999999  |
| <b>I</b>    | 0.1601800480000009  | 0.3203600109999982 | 0.3128400249999999  |
| <b>I</b>    | 0.6784899219999971  | 0.8392399700000013 | 0.5162000300000003  |
| <b>I</b>    | 0.1607599649999969  | 0.8392499260000008 | 0.5162000300000003  |
| <b>I</b>    | 0.1607500209999984  | 0.3215100070000005 | 0.5162000300000003  |
| <b>I</b>    | 0.9910599990000009  | 0.4955300060000027 | 0.4142700149999996  |
| <b>I</b>    | 0.5044700059999982  | 0.4955300060000027 | 0.4142700149999996  |
| <b>I</b>    | 0.5044699910000006  | 0.0089399820000011 | 0.4142700149999996  |
